1 A critical role of retinoic acid concentration for the induction of a fully human-like atrial phenotype in  
2 hiPSC-CM

3 Carl Schulz<sup>1,2</sup>, Muhammed Sönmez<sup>1,2</sup>, Julia Krause<sup>1,2,3,\*</sup>, Edzard Schwedhelm<sup>4,2</sup>, Pan Bangfen<sup>1,2</sup>,  
4 Dzenefa Alihodzic<sup>5</sup>, Arne Hansen<sup>1,2</sup>, Thomas Eschenhagen<sup>1,2</sup> & Torsten Christ<sup>1,2</sup>

5 <sup>1</sup>Institute of Experimental Pharmacology and Toxicology, University Medical Center Hamburg-  
6 Eppendorf, Hamburg, Germany;

7 <sup>2</sup>DZHK (German Centre for Cardiovascular Research), partner site Hamburg/Kiel/Lübeck, Hamburg,  
8 Germany;

9 <sup>3</sup>Department of Cardiology, University Heart and Vascular Center, Hamburg, Germany;

10 <sup>4</sup>Institute of Clinical Pharmacology and Toxicology, University Medical Center Hamburg-Eppendorf,  
11 Hamburg, Germany;

12 <sup>5</sup>Hospital Pharmacy, University Medical Center Hamburg-Eppendorf, Hamburg, Germany;

13

14 \*present address:

15 Stem Cell Biology, Novo Nordisk A/S, Måløv, Denmark

16

17 Address for correspondence

18 Professor Dr. med. Thomas Eschenhagen

19 E-Mail: t.eschenhagen@uke.de

20 or

21 PD Dr. med. Torsten Christ

22 Institute of Experimental Pharmacology and Toxicology

23 University Medical Centre Hamburg-Eppendorf

24 Martinistraße 52

25 20246 Hamburg

26 Telefon: 040-7410-52414

27 Fax: 040-7410-54876

28 E-Mail: t.christ@uke.de

29 Summary:

30 Retinoic acid (RA) induces an atrial phenotype in human induced pluripotent stem cells (hiPSC), but  
31 expression of atrium-selective currents such as the ultrarapid ( $I_{Kur}$ ) and acetylcholine-stimulated  $K^+$   
32 current ( $I_{K,ACh}$ ) is variable and less than in adult human atrium. We suspected methodological issues  
33 and systematically investigated the concentration-dependency of RA. RA treatment increased  $I_{Kur}$   
34 concentration-dependently from  $1.1 \pm 0.54$  pA/pF (0 RA) to  $3.8 \pm 1.1$ ,  $5.8 \pm 2.5$  and  $12.2 \pm 4.3$  at 0.01, 0.1  
35 and 1  $\mu$ M, respectively. Only 1  $\mu$ M RA induced enough  $I_{Kur}$  to fully reproduce human atrial AP shape  
36 and a robust shortening of action potentials (AP) upon carbachol. We found that sterile filtration  
37 caused substantial loss of RA. We conclude that 1  $\mu$ M RA appears necessary and sufficient to induce a  
38 full atrial AP shape in hiPSC-CM in EHT format. RA concentrations are prone to methodological  
39 issues and may profoundly impact success of atrial differentiation.

40

## 41 **Introduction**

42 Human induced pluripotent stem cell-derived cardiomyocytes (hiPSC-CM) represent a model to study  
43 electrophysiological consequences of gene variants and mutations on a human background.  
44 Consequently, several models have been developed to investigate ventricular arrhythmias. However,  
45 atrial fibrillation (AF) is much more common than ventricular arrhythmias and cannot yet be studied  
46 sufficiently in hiPSC-CM. Atrial-like hiPSC-CMs (hiPSC-aCM) resembling the electrophysiological  
47 properties of the human atrium could be used to investigate mechanisms of AF in vitro. In addition,  
48 hiPSC-aCMs could give fundamental insight into pacing-induced electrical remodeling, a technique  
49 frequently used in animals that lead to the widely accepted concept of AF-induced remodeling  
50 (Wijffels et al., 1995). Thus, recently developed protocols for the differentiation of hiPSC-aCM are an  
51 important progress in modeling atrial electrophysiology in a human setting (Goldfracht et al., 2020;  
52 Laksman et al., 2017; Soepriatna et al., 2021).

53 Retinoic acid (RA) has been identified as a critical factor during atrial differentiation of hiPSC  
54 (Devalla et al., 2015; Lee et al., 2017). Indeed, inclusion of RA in standard differentiation protocols  
55 induced several electrophysiological parameters indicating an atrial, rather than ventricular phenotype  
56 of the resulting hiPSC-aCM. The presence of the G-protein-gated  $K^+$  channel ( $I_{K,ACH}$ ) is a hallmark of  
57 atrial and absent in ventricular cardiomyocytes (Heidbüchel et al., 1987) and therefore researchers  
58 have looked for shortening of  $APD_{90}$  upon activation of muscarinic receptors, but effect sizes were  
59 small and variable in two studies (Devalla et al., 2015; Lemme et al., 2018). Large mammals (dog and  
60 human) also possess large transient potassium currents consisting of the transient outward current ( $I_{to}$ )  
61 and the atrial-selective, ultrarapidly activating potassium current ( $I_{Kur}$ ) (Burashnikov et al., 2004;  
62 Ravens and Wettwer, 2011). These currents dominate the early repolarization phase and lead to the  
63 typical spike and dome shape of the atrial action potential (AP). In notable contrast, hiPSC-aCM  
64 resulting from various RA-supplemented differentiation protocols exhibited a rather triangular AP  
65 shape without the prominent spike (Argenziano et al., 2018; Goldfracht et al., 2020; Gunawan et al.,  
66 2021; Honda et al., 2021; Pei et al., 2017), indicating incomplete atrial differentiation. In our own  
67 hands, the AP shape of engineered heart tissue (EHT) from hiPSC-aCM showed strong inter-

68 investigator variability, indicating methodological issues during the differentiation process. Given the  
69 established key role of RA, we set out to prospectively investigate the concentration-dependent effects  
70 of RA on amplitudes of the atrial selective  $I_{Kur}$  in hiPSC-aCM. The contribution of  $I_{Kur}$  and  $I_{K,ACh}$  to  
71 repolarization was estimated from AP recordings which were measured in intact aEHT.

72

## 73 **Results**

74 To study the concentration-dependency of RA on atrial specification we added RA at 0.01, 0.1 or 1  
75  $\mu\text{M}$  after mesodermal induction of hiPSC for 3 days (Lemme et al., 2018). Cells cultured in the  
76 absence of RA were used as controls. We followed a standard embryoid body-based spinner protocol  
77 for cardiac differentiation of hiPSC (Breckwoldt et al., 2017). After EB dissociation, EHTs were  
78 casted, cultured for 4 weeks before they were used for either AP recordings or patch clamping in  
79 dissociated hiPSC-CM.

### 80 *Concentration-dependent effects of RA on outward currents*

81 In human hearts, outward currents are larger in atrial than in ventricular cardiomyocytes, partially due  
82 to expression of the atrial-selective  $I_{Kur}$  in atria (Amos et al., 1996). In order to quantify effects of RA  
83 on atrial differentiation, we measured outward currents in hiPSC-CM differentiated in the presence of  
84 different concentrations of RA and in controls (differentiated in the absence of RA). We separated  $I_{Kur}$   
85 from total outward current by applying a low concentration of the non-selective potassium channel  
86 blocker 4-AP (50  $\mu\text{M}$ ). Experiments were finished by 5 mM 4-AP to block not only  $I_{Kur}$  but also  $I_{to}$ .

87 We found transient outward currents in all individual hiPSC-CM (**Figure 1A, 1B**). In hiPSC-CM  
88 derived from a RA-free differentiation protocol, peak outward currents were not suppressed by 50  $\mu\text{M}$   
89 4-AP, indicating absence of  $I_{Kur}$ . Even the lowest concentration of RA (0.01  $\mu\text{M}$ ) was able to induce an  
90 outward current component sensitive to 50  $\mu\text{M}$  4-AP:  $I_{Kur}$ . Cells treated with higher RA concentrations  
91 showed progressively more  $I_{Kur}$  (with 1  $\mu\text{M}$  RA:  $12.1 \pm 2.5$ ,  $n=16$ ) but also  $I_{to}$  (difference between the

92 current in the presence of 50  $\mu\text{M}$  4-AP and the current in the presence of 5 mM 4-AP:  $33.5 \pm 6.5$  pA/pF,  
93  $n=16$ ) and in a 4-AP-insensitive outward current component.

94 *Large transient outward currents are needed to recapitulate the high repolarization fraction and low*  
95 *plateau voltage typical for human atrium*

96 To investigate whether the RA-induced increase in outward currents is able to reproduce the typical  
97 spike and dome shape of the human atria, we measured AP by sharp microelectrodes in intact EHT  
98 casted from hiPSC-CM differentiated in the absence and in the presence of different concentrations of  
99 RA. EHTs from hiPSC-CM differentiated in the presence of RA beat faster without differences  
100 between RA groups (**Figure 2B**). Take-off potentials were less negative in EHT cultured with 0.1 and  
101 1  $\mu\text{M}$  RA than in those cultured with 0.01  $\mu\text{M}$  or in the absence of RA (**Figure 2**). Effects of RA were  
102 more pronounced on action potential duration (APD). Even with low RA concentration (0.01 and 0.1  
103  $\mu\text{M}$ ) APD<sub>90</sub> was shorter than in the control group. Similar shortening of APD<sub>20</sub> and APD<sub>90</sub> resulted in  
104 an unchanged repolarization fraction (APD<sub>90</sub>-APD<sub>20</sub>/APD<sub>90</sub>) in these two groups (**Figure 2**). In  
105 contrast, EHT casted from hiPSC-CM differentiated in the presence of 1  $\mu\text{M}$  RA had a drastically  
106 shorter APD<sub>20</sub> without further shortening of APD<sub>90</sub>, leading to the typical spike and dome AP shape of  
107 adult human atrium and a lower repolarization fraction (**Figure 2**). Thus, a critical concentration of  
108 RA (1  $\mu\text{M}$ ) is necessary and sufficient to induce a typical human atria-like AP shape in hiPSC-aCM in  
109 the EHT format.

110 *Large transient outward currents are required to recapitulate  $I_{K_{ur}}$  block response pattern as seen in*  
111 *human atrium*

112 In human atrium, block of  $I_{K_{ur}}$  shifts the plateau voltage to less negative values and leads to a  
113 seemingly paradoxical abbreviation of terminal repolarization, i.e. decrease in APD<sub>90</sub>, because another  
114 important potassium current ( $I_{K_r}$ ) gets stronger activated at the less negative plateau voltage (Wettwer  
115 et al., 2004). To assess how much RA is needed to reproduce this pattern, we measured the effects of  
116  $I_{K_{ur}}$  block (50  $\mu\text{M}$  4-AP) in EHT casted from hiPSC-CM differentiated in the absence or presence of  
117 RA (0.01, 0.1 and 1  $\mu\text{M}$ ). In controls (0 RA), 50  $\mu\text{M}$  4-AP did not change APD (APD<sub>20</sub> or APD<sub>90</sub>) or

118 plateau voltage (**Figure 3**). In contrast, 4-AP prolonged  $APD_{20}$  in all three RA groups, indicating that  
119 even low concentrations of RA induce a relevant contribution of the atrial-selective  $I_{Kur}$  to  
120 repolarization. Only in EHT casted from hiPSC-CM differentiated in the presence of  $1\ \mu\text{M}$  RA, block  
121 of  $I_{Kur}$  shifted plateau voltage to less negative values accompanied by shortening in  $APD_{90}$ , i.e. the  
122 canonical pattern of adult human atrium.

123 To investigate whether shortening of  $APD_{90}$  upon  $I_{Kur}$  block in EHT ( $1\ \mu\text{M}$  RA) is mediated by  $I_{Kr}$ , we  
124 repeated experiments in the presence of the  $I_{Kr}$  blocker E-4031 ( $1\ \mu\text{M}$ ).  $I_{Kr}$  block alone prolonged  
125  $APD_{90}$ , but not  $APD_{20}$ . E-4031 did not affect plateau voltage. As seen before in the absence of E-4031,  
126  $I_{Kur}$  block by  $50\ \mu\text{M}$  4-AP shifted plateau voltage to less negative values when given on top of E-4031.  
127 However, under this condition, 4-AP no longer shortened, but prolonged  $APD_{90}$  (**Figure 4**).

128 *Low concentrations of RA are insufficient to produce relevant APD shortening upon muscarinic*  
129 *receptor activation*

130 Besides  $I_{Kur}$ , the physiology of human atria is characterized by the expression of large acetylcholine-  
131 sensitive inward rectifying ion currents,  $I_{K,ACh}$ . To assess  $I_{K,ACh}$  contribution to the AP shape, we  
132 measured AP responses to  $10\ \mu\text{M}$  carbachol (CCh) in EHT from the three RA groups. We found a  
133 slight, but significant decrease in beating rate upon CCh in all three groups (**Figure 4**). However, only  
134 in EHT of the  $1\ \mu\text{M}$  RA group, CCh significantly decreased  $APD_{90}$  and shifted take-off potential  
135 (TOP) to more negative values. To investigate whether  $1\ \mu\text{M}$  RA has an uniform effect on the  
136 occurrence of  $I_{K,ACh}$  in hiPSC-CM differentiated with RA, we measured CCh responses of inward  
137 rectifier currents in single hiPSC-aCM (isolated from EHT of the  $1\ \mu\text{M}$  RA group only). Current  
138 density, measured at  $-100\ \text{mV}$ , before adding CCh was  $7.7\pm 0.9\ \text{pA/pF}$  ( $n=34$ ). We saw a rapid  
139 increase in inward rectifier current upon exposure to CCh (**Figure 6**). There was a large scatter in  
140 effect size between individual cells, but any cells showed an increase. Mean current density was more  
141 than doubled with  $18.9\pm 2.1\ \text{pA/pF}$  ( $p<0.05$ , paired t-test), indicating robust and uniform expression of  
142  $I_{K,ACh}$  in hiPSC-CM when differentiated in the presence of  $1\ \mu\text{M}$  RA.

143 *Loss of RA by sterile filtration*

144 Given the obvious discrepancies between the present results and our own study using a very similar  
145 methodology (Lemme et al. 2018), we carefully compared experimental procedures and identified  
146 sterile filtration of stock solution of RA in the prior study to be the only apparent difference. We  
147 suspected sterile filtration as a critical step leading to substantial loss of RA concentration in stock  
148 solutions. We therefore measured effect of sterile filtration on RA concentration by three different  
149 filters. All three filters adsorbed a significant amount of RA (**Table 1**). When using a PETF filter RA  
150 recovery was only about 0.1%.

### 151 *Reproducibility of RA-effects on AP shape*

152 We have addressed the issue of reproducibility of RA-treatment on AP shape in a larger number of  
153 EHT prepared from three different batches (both RA treated and non-treated). In addition, experiments  
154 were done in a second, independent cell line (ERC018). RA-treatment induced an atrial-like AP  
155 shape ( $V_{\text{Plateau}} < 0$  mV,  $\text{APD}_{20} < 15$  ms and repolarization fraction close to 0) in all three batches of  
156 both cell lines. There was no overlap in the selected parameters between EHT based on hiPSC-CM  
157 treated or not treated with RA

158

### 159 Discussion

160 Our study has two implications:

- 161 1. A concentration of 1  $\mu\text{M}$  RA is sufficient and necessary to induce a fully human-like atrial AP  
162 phenotype in hiPSC-CM in the EHT format.
- 163 2. Sterile filtration of RA can lead to a relevant loss of RA loss, preventing induction of the  
164 adult-like atrial AP phenotype.

165 RA is crucial to induce atrial differentiation in hiPSC-CM, and several groups have used the shape of  
166 AP as proof of an atrial phenotype in RA-treated hiPSC-CM (**Table 2**). While it is clear that all studies  
167 show RA-induced effects on AP parameters towards a human atrial phenotype when compared to CM

168 from standard differentiation protocols, the “atrial myocyte-likeness” varies widely. We will discuss  
169 some points that could be relevant for the inconsistencies.

#### 170 *Effects of cell source (hESC vs. hiPSC) and culture conditions (3D vs. 2D)*

171 It seems reasonable to suspect an impact of cell source on the success of RA to induce an atrial AP  
172 phenotype. Three out of seven papers that reports in detail effects of RA on AP shape have used hESC  
173 (Devalla et al., 2015; Laksman et al., 2017; Zhang et al., 2011), the other four studies hiPSC (Cyganek  
174 et al., 2018; Goldfracht et al., 2020; Lee et al., 2017; Lemme et al., 2018). Data on APD<sub>20</sub> are  
175 available from most studies (**Table 2**). APD<sub>20</sub> was consistently short in both studies based on hESC  
176 (Devalla et al., 2015; Laksman et al., 2017), but varied widely when hiPSC were used. The data could  
177 indicate that RA effects are less robust in hiPSC, but the current data in hiPSC argue against this idea.  
178 Alternatively, the biology of individual hiPSC lines may vary more than that of hESC lines.

179 Direct head-to-head comparisons of 2D and 3D culture conditions are, to the best of our knowledge,  
180 limited to an earlier study of our group, but here the effects of RA were more pronounced in 3D EHTs  
181 than 2D monocultures, both in terms of atrial gene expression patterns and repolarization fraction  
182 (Lemme et al., 2018). The fact that repolarization fraction was higher in 3D than in 2D even in the  
183 absence of RA indicates that the 3D format itself contributes to improved atrial phenotype in 3D  
184 (Lemme et al., 2018). On the other hand, three out of four studies on RA-treated hESC-CM/hiPSC-  
185 CM cultured in 2D format reported APD<sub>20</sub> values between 13 and 37 ms, close to situation in human  
186 atrium (Devalla et al., 2015; Laksman et al., 2017; Lee et al., 2017), indicating that RA is able to  
187 induce a strong, atrial-like early repolarization also in the 2D format.

#### 188 *Recording techniques and other methodological conditions*

189 We measured AP in intact EHT with sharp microelectrodes, while AP in hESC-aCM and hiPSC-aCM  
190 were mostly assessed by patch clamp recordings in isolated cells. This methodological difference may  
191 count. We observed previously that data scatter of APD and RMP was much larger when AP were  
192 measured in isolated cells compared to intact tissues (Horváth et al., 2018). The parameter



193 repolarization fraction loses its power to discriminate between adult human ventricle and atrium when  
194 AP were measured in individual cells (Horváth et al., 2018).

195 In contrast, enzymatic isolation maybe an important reason for the observed differences. Devalla et al.  
196 (Devalla et al., 2015) reported a short APD<sub>20</sub> and a strong effect of 4-AP at 50  $\mu$ M (including an  
197 upwards shift of  $V_{\text{plateau}}$  like in this study and in human adult atrium), but APD<sub>90</sub> was prolonged in the  
198 presence of 4-AP instead of the expected shortening. This finding strikingly resembles the situation we  
199 report here obtained in the presence of E-4031. The  $I_{\text{Kur}}$  block-induced shortening of APD<sub>90</sub> depends  
200 on  $I_{\text{Kr}}$ , both in human adult atrium (Wettwer et al., 2004) and in hiPSC-aCM (**Figure 4**). Importantly,  
201 the hERG channel that mediates  $I_{\text{Kr}}$  can be destroyed by enzymes frequently used for cell isolation. In  
202 fact,  $I_{\text{Kr}}$  currents disappeared within minutes when cells were superfused with protease XIV, protease  
203 XXIV, proteinase K, or trypsin (Rajamani et al., 2006). Devalla et al. used a commercial kit  
204 (TrypLE™ Select Enzym, catalogue no. 12563011, ThermoFisher, Waltham, Massachusetts, USA)  
205 that contains a not further defined protease. Therefore, it seems justified to speculate that enzymatic  
206 dissociation of hiPSC-aCM may have abolished the contribution of  $I_{\text{Kr}}$  to AP regulation and thereby  
207 changed the response pattern to  $I_{\text{Kur}}$  block in their study.

#### 208 *Loss of RA by sterile filtration*

209 We saw a substantial loss of RA by sterile filtration. Effects are so large that we would no longer  
210 expect full effects of RA on differentiation. It is hard to determine if loss of RA by sterile filtration  
211 may explain the variability between different studies mentioned above since not only one study  
212 (including ours) has reported whether RA stock solutions or RA containing culture medium were  
213 sterile filtered or not. We felt safe to perform sterile filtration since the manufacturers states in its  
214 official product information that “Mahady and Beecher report sterile filtering RA solutions before  
215 addition to suspension cells” (Sigma, 1996). However, we were surprised that RA recovery after  
216 sterile filtration was not reported in the cited paper (Mahady and Beecher, 1996). No details on the  
217 filter material were given in that study. At least contemporarily used sterile filters absorb huge

218 amounts of RA. Thus it seem wise to check recovery of RA or to refrain from sterile filtration of RA  
219 containing solutions.

## 220 **Limitations**

221 We cannot exclude that changes in other currents like outward currents may have contributed to the  
222 effects of RA on repolarization. We haven't used RA concentrations higher than 1  $\mu$ M. Thus, it  
223 remains open whether higher RA concentration than 1  $\mu$ M can have detrimental effects on AP shape in  
224 hiPSC-CM. We did not measure effects of RA treatment on gene expression.

## 225 **Experimental procedures**

### 226 **Atrial differentiation of hiPSC and generation of atrial EHT**

227 For all experiments the healthy in house control cell line ERC001 and ERC018 were used (UKEi001-  
228 A, <https://hpscereg.eu/cell-line/UKEi001-A>; UKEi003, <https://hpscereg.eu/cell-line/UKEi003-C>). All  
229 experimental methods for these procedures were approved by the Ethical Committee of the University  
230 Medical Center Hamburg-Eppendorf (Az. PV4798, 28.10.2014). All patients gave written informed  
231 consent. Protocols for hiPSC expansion, atrial cardiomyocyte differentiation and EHT generation for  
232 both hiPSC lines were performed as previously described (Breckwoldt et al., 2017). The hiPSC lines  
233 were derived from dermal fibroblasts from two healthy donors. In brief, embryoid bodies (EBs) were  
234 generated from expanded hiPSCs using spinner flasks and stirred suspension. Mesodermal induction  
235 was performed by growth factor cocktail (BMP-4 10 ng/ml, activin A 3 ng/ml, bFGF 5 ng/ml) for  
236 three days and the cardiac differentiation by WNT signal inhibitor XAV939 (1  $\mu$ M). For the induction  
237 of atrial cardiomyocyte differentiation, RA (0.01, 0.1 or 1  $\mu$ M) was added for the first 72 hours of  
238 WNT signalling inhibition as recently described (Lemme et al., 2018). RA (Sigma Aldrich R2625)  
239 was dissolved in DMSO (Dimethyl Sulfoxide; stock concentration 100  $\mu$ M) and used **without sterile**  
240 **filtration**. The differentiation run for all hiPSC treated with different RA-concentrations and for the  
241 respective control (0 RA) were prospectively performed in parallel.

242 After successful differentiation, dissociation of EBs was performed with collagenase II (200 U/L,  
243 Worthington, LS004176 in Hank's balanced salt solution minus  $\text{Ca}^{2+}/\text{Mg}_{2+}$ , Gibco, 14175-053 3.5 h,  
244 normoxia, 37 °C) (Breckwoldt et al., 2017). EBs were incubated with collagenase for 3.5 h (37 °C,  
245 normoxia) and were dispersed to isolated atrial cardiomyocytes (hiPSC-aCM).

246 Atrial-like engineered heart tissue (aEHT) was generated from 1 million hiPSC-aCM per construct.  
247 The fibrin gel matrix was made by mixing hiPSC-aCM, fibrinogen (Sigma F4753) and thrombin (100  
248 U/L, Sigma Aldrich T7513) which were poured into agarose (1%) casting molds with silicone posts  
249 inserted from above (Breckwoldt et al., 2017; Hansen et al., 2010; Lemme et al., 2018).

### 250 **Action potential measurement**

251 AP measurements were performed with standard sharp microelectrode as described  
252 previously.(Lemoine et al., 2018; Wettwer et al., 2013) All measurements were done in aEHTs which  
253 were continuously superfused with Tyrode's solution (NaCl 127 mM, KCl 5.4 mM,  $\text{MgCl}_2$  1.05 mM,  
254  $\text{CaCl}_2$  1.8 mM, glucose 10 mM,  $\text{NaHCO}_3$  22 mM,  $\text{NaHPO}_4$  0.42 mM, balanced with  $\text{O}_2\text{-CO}_2$  [95:5] at  
255 36°C, pH 7.4). The sharp microelectrode consisted of filamented borosilicate glass capillaries with an  
256 external diameter of 1.5 mm and internal diameter of 0.87 mm (HILG1103227; Hilgenberg, Malsfeld,  
257 Germany). The DPZ-Universal puller (Zeitz Instruments, Munich, Germany) was used to fabricate  
258 microelectrodes which had a resistance between 25 - 55 M $\Omega$  when filled with 2 M KCl. The pipettes  
259 were controlled by a hydraulic micromanipulator (Narishige MO-203) ensuring a delicate contact to  
260 the tissue. The aEHTs were transferred from the 24-well EHT culture plate into the AP measuring  
261 chamber by cutting the silicone posts and were fixed with needles in an optimal position for AP  
262 recording. The signals were amplified by a BA-1s npi amplifier (npi electronic GmbH, Tamm,  
263 Germany). APs were recorded and analysed using the Lab-Chart software (version 5, AD Instruments  
264 Pty Ltd., Castle Hill NSW, Australia). Definition of  $V_{\text{PLATEAU}}$  (Ford et al., 2013) was slightly modified  
265 as the voltage at in the range of  $\pm 5$  ms time around 30% of  $\text{APD}_{90}$ . Take-of potential (TOP) was  
266 defined as the diastolic membrane potential directly before the upstroke.

### 267 **Current measurements**

268 Ion currents were measured at 37 °C using the whole-cell configuration of the patch-clamp technique  
269 by an Axopatch 200B amplifier (Axon Instruments, Foster City, CA, USA). The ISO2 software was  
270 used for data acquisition and analysis (MFK, Niedernhausen, Germany). Heat-polished pipettes were  
271 pulled from borosilicate filamented glass (Hilgenberg, Malsfeld, Germany). Tip resistances were 2.5–  
272 5 MΩ, seal resistances were 3–6 GΩ. Cell capacitance ( $C_m$ ) was calculated from steady-state current  
273 during depolarizing ramp pulses (1V/1s) from –40 to –35 mV. Human iPSC-CMs used for patch  
274 clamp measurements were dissociated from EHT by collagenase II (200 U/mL; Worthington  
275 Biochemical, Lakewood, NJ, USA) for 5 h. Isolated cells were plated on gelatine-coated (0.1%) glass  
276 coverslips (12 mm diameter; Carl Roth GmbH + Co, Karlsruhe, Germany) and kept in culture for 24–  
277 48 h to maintain adherence under superfusion in the recording chamber during patch clamp  
278 measurements. The cells were investigated in a small perfusion chamber placed on the stage of an  
279 inverse microscope. Inward rectifier currents were measured with the following bath solution (in mM):  
280 NaCl 120, KCl 20, HEPES 10, CaCl<sub>2</sub> 2, MgCl<sub>2</sub> 1 and glucose 10 (pH 7.4, adjusted with NaOH.  
281 Contaminating Ca<sup>2+</sup> currents were suppressed with the selective L-type calcium channel blocker  
282 nifedipine (10 μM). The internal solution included (in mM): DL-Aspartate potassium salt 80, KCl 40,  
283 NaCl 8, HEPES 10, Mg-ATP 5, Tris-GTP 0.1, EGTA 5 and CaCl<sub>2</sub> 2, pH 7.4, adjusted with KOH.  
284 Inward Current amplitudes were determined as currents at –100 mV(Horváth et al., 2018). A single  
285 concentration (2 μM) of the muscarinic receptor agonist carbachol (CCh) was used to evoke  $I_{K,ACh}$ .  
286 Transient outward currents were measured in a slightly modified bath solution (KCl 5.4 instead of 20).  
287 Currents were elicited by 500 ms long test pulses to +50 mV applied every five seconds from a  
288 holding potential of -60 mV (Christ et al., 2008). Cells were exposed to two concentrations of 4-AP  
289 (50 μM and 5 mM).

## 290 **Sterile filtration and mass spectrometry**

291 We prepared RA stock solutions (100 μM) in DMSO. One mL of this solution was filtrated through 3  
292 different sterile filters: Filtropur S<sup>®</sup> (pore size 0.2 μm, polyethersulfon), Saarstedt, Nümbrecht,  
293 Germany; Millex-GP<sup>®</sup> (pore size 0.22 μM, polyethersulfon), Merck Millipore Ltd., Cork, Ireland and

294 Whatman® REZIST (pore size 0.2 µm, polytetrafluorethen), Cytiva, Marlborough, MA, USA.  
295 Unfiltered solution was used as control.

296 RA was quantified by liquid chromatography-tandem mass spectrometry (LC-MS/MS) as described  
297 previously (Morgenstern et al., 2021). Stock solutions of retinoic acid and internal standard, i.e. all-  
298 trans retinoic acid-d5 (Cayman Chemical, Ann Arbor, MI, USA), were made up in DMSO,  
299 respectively (1 mg/mL). Calibration curves ranged from 10 ng/mL to 1000 ng/mL, five levels. 20 µL  
300 of calibrator or sample were added to 1.5 ml Eppendorf tubes and 20 µL of all-trans retinoic acid-d5 at  
301 1000 ng/mL were added to each tube and vortexed briefly. 200 µL of acetonitrile was added to each  
302 tube and vortexed for 1 min prior to centrifugation for 10 minutes at 13000 rpm. 100 µL of  
303 supernatant was transferred to an MS 96well plate with 20 µL of water and capped. LC was performed  
304 applying a gradient of 0.8 mL/min 25/75%, vol/vol%, A (0.1 % formic acid) and B  
305 (acetonitrile/methanol, 50/50), to 2/98% over 2:50 min:sec on a Luna™ 5 µm C18 50x2.0 mm 100 A  
306 column (Phenomenex, Aschaffenburg, Germany). For MS/MS analyses in the positive electrospray  
307 ionisation mode on a Varian 1200 TSQ (Agilent Technologies, Santa Clara, CA, USA) the transitions  
308 m/z 301.2>123.0 @18 eV and m/z 306.2>127.0 @18 eV were monitored for retinoic acid and internal  
309 standard, respectively and concentrations were calculated by peak area ratio determination of  
310 calibrators and samples.

### 311 **Statistics**

312 Statistical analyses were performed by using GraphPad Prism software version 7 (GraphPad Software,  
313 San Diego, CA, USA). Data are presented as mean ± SD. Log-transformation was used to allow  
314 application of parametric testing of data (Ismaili et al., 2020). Statistical significance was considered  
315 for differences with a value of  $p < 0.05$ .

316

317 Author contribution

318 C.S., J.K., B.P., A.H., T.E., D.A. and T.C. planned experiments. C.S., M.S. T.E., D.A. and T.C.  
319 contributed to experiments and data analysis. C.S. T.E. and T.C. wrote the manuscript. All authors  
320 approved the final version of the manuscript.

#### 321 Acknowledgments

322 Authors thank Anna Steenpaß for excellent help with patch clamp measurements and technical support  
323 in action potential recordings. We are grateful to Birgit Klampe and Thomas Schulze for help with  
324 CM differentiation.

325

326

#### 327 References

328 Amos, G.J., Wettwer, E., Metzger, F., Li, Q., Himmel, H.M., and Ravens, U. (1996). Differences  
329 between outward currents of human atrial and subepicardial ventricular myocytes. *J. Physiol.* *491*, 31–  
330 50.

331 Argenziano, M., Lambers, E., Hong, L., Sridhar, A., Zhang, M., Chalazan, B., Menon, A., Savio-  
332 Galimberti, E., Wu, J.C., Rehman, J., et al. (2018). Electrophysiologic Characterization of Calcium  
333 Handling in Human Induced Pluripotent Stem Cell-Derived Atrial Cardiomyocytes. *Stem Cell Reports*  
334 *10*, 1867–1878.

335 Breckwoldt, K., Letuffe-Brenière, D., Mannhardt, I., Schulze, T., Ulmer, B., Werner, T., Benzin, A.,  
336 Klampe, B., Reinsch, M.C., Laufer, S., et al. (2017). Differentiation of cardiomyocytes and generation  
337 of human engineered heart tissue. *Nat. Protoc.* *12*, 1177–1197.

338 Burashnikov, A., Mannava, S., and Antzelevitch, C. (2004). Transmembrane action potential  
339 heterogeneity in the canine isolated arterially perfused right atrium: Effect of IKr and I Kur/Ito block.  
340 *Am. J. Physiol. - Hear. Circ. Physiol.* *286*, 2393–2400.

341 Christ, T., Wettwer, E., Voigt, N., Hála, O., Radicke, S., Matschke, K., Várro, A., Dobrev, D., and  
342 Ravens, U. (2008). Pathology-specific effects of the I *Kur*/I *to*/I  
343 *K*,ACh blocker AVE0118 on ion channels in human chronic atrial fibrillation. *Br. J.*  
344 *Pharmacol.* *154*.

345 Cyganek, L., Tiburcy, M., Sekeres, K., Gerstenberg, K., Bohnenberger, H., Lenz, C., Henze, S.,  
346 Stauske, M., Salinas, G., Zimmermann, W.H., et al. (2018). Deep phenotyping of human induced  
347 pluripotent stem cell-derived atrial and ventricular cardiomyocytes. *JCI Insight* *3*.

348 Devalla, H.D., Schwach, V., Ford, J.W., Milnes, J.T., El-Haou, S., Jackson, C., Gkatzis, K., Elliott,  
349 D.A., Chuva de Sousa Lopes, S.M., Mummery, C.L., et al. (2015). Atrial-like cardiomyocytes from  
350 human pluripotent stem cells are a robust preclinical model for assessing atrial-selective  
351 pharmacology. *EMBO Mol. Med.* *7*, 394–410.

352 Ford, J., Milnes, J., Wettwer, E., Christ, T., Rogers, M., Sutton, K., Madge, D., Virag, L., Jost, N.,  
353 Horvath, Z., et al. (2013). Human electrophysiological and pharmacological properties of XEN-  
354 D0101: A novel atrial-selective *Kv1.5*/I*Kur* inhibitor. *J. Cardiovasc. Pharmacol.* *61*, 408–415.

355 Goldfracht, I., Protze, S., Shiti, A., Setter, N., Gruber, A., Shaheen, N., Nartiss, Y., Keller, G., and  
356 Gepstein, L. (2020). Generating ring-shaped engineered heart tissues from ventricular and atrial  
357 human pluripotent stem cell-derived cardiomyocytes. *Nat. Commun.* *11*, 1–15.

358 Gunawan, M.G., Sangha, S.S., Shafaattalab, S., Lin, E., Heims-Waldron, D.A., Bezzerides, V.J.,  
359 Laksman, Z., and Tibbits, G.F. (2021). Drug screening platform using human induced pluripotent stem  
360 cell-derived atrial cardiomyocytes and optical mapping. *Stem Cells Transl. Med.* *10*, 68–82.

361 Hansen, A., Eder, A., Bonstrup, M., Flato, M., Mewe, M., Schaaf, S., Aksehirioglu, B., Schworer, A.,  
362 Uebeler, J., Eschenhagen, T., et al. (2010). Development of a Drug Screening Platform Based on  
363 Engineered Heart Tissue. *Circ. Res.*

364 Heidbüchel, H., Vereecke, J., and Carmeliet, E. (1987). The electrophysiological effects of

- 365 acetylcholine in single human atrial cells. *J. Mol. Cell. Cardiol.* *19*, 1207–1219.
- 366 Honda, Y., Li, J., Hino, A., Tsujimoto, S., and Lee, J.K. (2021). High-Throughput Drug Screening  
367 System Based on Human Induced Pluripotent Stem Cell-Derived Atrial Myocytes ~ A Novel Platform  
368 to Detect Cardiac Toxicity for Atrial Arrhythmias. *Front. Pharmacol.* *12*, 1–12.
- 369 Horváth, A., Lemoine, M.D., Löser, A., Mannhardt, I., Flenner, F., Uzun, A.U., Neuber, C.,  
370 Breckwoldt, K., Hansen, A., Girdauskas, E., et al. (2018). Low Resting Membrane Potential and Low  
371 Inward Rectifier Potassium Currents Are Not Inherent Features of hiPSC-Derived Cardiomyocytes.  
372 *Stem Cell Reports* *10*, 822–833.
- 373 Ismaili, D., Geelhoed, B., and Christ, T. (2020). Ca<sup>2+</sup> currents in cardiomyocytes: How to improve  
374 interpretation of patch clamp data? *Prog. Biophys. Mol. Biol.* *157*, 33–39.
- 375 Laksman, Z., Wauchop, M., Lin, E., Protze, S., Lee, J., Yang, W., Izaddoustdar, F., Shafaattalab, S.,  
376 Gepstein, L., Tibbits, G.F., et al. (2017). Modeling Atrial Fibrillation using Human Embryonic Stem  
377 Cell-Derived Atrial Tissue. *Sci. Rep.* *7*, 1–11.
- 378 Lee, J.H., Protze, S.I., Laksman, Z., Backx, P.H., and Keller, G.M. (2017). Human Pluripotent Stem  
379 Cell-Derived Atrial and Ventricular Cardiomyocytes Develop from Distinct Mesoderm Populations.  
380 *Cell Stem Cell* *21*, 179-194.e4.
- 381 Lemme, M., Ulmer, B.M., Lemoine, M.D., Zech, A.T.L.L., Flenner, F., Ravens, U., Reichenspurner,  
382 H., Rol-Garcia, M., Smith, G., Hansen, A., et al. (2018). Atrial-like Engineered Heart Tissue: An In  
383 Vitro Model of the Human Atrium. *Stem Cell Reports* *11*, 1378–1390.
- 384 Lemoine, M.D., Krause, T., Koivumäki, J.T., Prondzynski, M., Schulze, M.L., Girdauskas, E.,  
385 Willems, S., Hansen, A., Eschenhagen, T., and Christ, T. (2018). Human Induced Pluripotent Stem  
386 Cell-Derived Engineered Heart Tissue as a Sensitive Test System for QT Prolongation and  
387 Arrhythmic Triggers. *Circ. Arrhythmia Electrophysiol.* *11*.
- 388 Mahady, G.B., and Beecher, C.W.W. (1996). Induction of benzo[c]phenanthridine alkaloid



- 389 biosynthesis in suspension cell cultures of *Sanguinaria canadensis* by retinoic acid derivatives. *Nat.*  
390 *Prod. Lett.* 8, 173–180.
- 391 Morgenstern, J., Fleming, T., Kliemank, E., Brune, M., Nawroth, P., and Fischer, A. (2021).  
392 Quantification of all-trans retinoic acid by liquid chromatography–tandem mass spectrometry and  
393 association with lipid profile in patients with type 2 diabetes. *Metabolites* 11, 1–10.
- 394 Pei, F., Jiang, J., Bai, S., Cao, H., Tian, L., Zhao, Y., Yang, C., Dong, H., and Ma, Y. (2017).  
395 Chemical-defined and albumin-free generation of human atrial and ventricular myocytes from human  
396 pluripotent stem cells. *Stem Cell Res.* 19, 94–103.
- 397 Rajamani, S., Anderson, C.L., Valdivia, C.R., Eckhardt, L.L., Foell, J.D., Robertson, G.A., Kamp,  
398 T.J., Makielski, J.C., Anson, B.D., and January, C.T. (2006). Specific serine proteases selectively  
399 damage KCNH2 (hERG1) potassium channels and IKr. *Am. J. Physiol. - Hear. Circ. Physiol.* 290,  
400 1278–1288.
- 401 Ravens, U., and Wettwer, E. (2011). Ultra-rapid delayed rectifier channels: Molecular basis and  
402 therapeutic implications. *Cardiovasc. Res.* 89, 776–785.
- 403 Sigma (1996). all trans-RETINOIC ACID Sigma Prod . No . R 2625.
- 404 Soepriatna, A.H., Kim, T.Y., Daley, M.C., Song, E., Choi, B.R., and Coulombe, K.L.K. (2021).  
405 Human Atrial Cardiac Microtissues for Chamber-Specific Arrhythmic Risk Assessment. *Cell. Mol.*  
406 *Bioeng.* 14, 441–457.
- 407 Wettwer, E., Hála, O., Christ, T., Heubach, J.F., Dobrev, D., Knaut, M., Varró, A., and Ravens, U.  
408 (2004). Role of IKur in controlling action potential shape and contractility in the human atrium:  
409 Influence of chronic atrial fibrillation. *Circulation* 110, 2299–2306.
- 410 Wettwer, E., Christ, T., Endig, S., Rozmaritsa, N., Matschke, K., Lynch, J.J., Pourrier, M., Gibson,  
411 J.K., Fedida, D., Knaut, M., et al. (2013). The new antiarrhythmic drug vernakalant: Ex vivo study of  
412 human atrial tissue from sinus rhythm and chronic atrial fibrillation. *Cardiovasc. Res.* 98, 145–154.

413 Wijffels, M.C.E.F., Kirchhof, C.J.H.J., Dorland, R., and Allessie, M.A. (1995). Atrial fibrillation  
414 begets atrial fibrillation: A study in awake chronically instrumented goats. *Circulation* 92, 1954–1968.

415 Zhang, Q., Jiang, J., Han, P., Yuan, Q., Zhang, J., Zhang, X., Xu, Y., Cao, H., Meng, Q., Chen, L., et  
416 al. (2011). Direct differentiation of atrial and ventricular myocytes from human embryonic stem cells  
417 by alternating retinoid signals. *Cell Res.*

418

419

420 **Legends to figures**

421 **Figure 1: Concentration-dependency of RA on outward currents in hiPSC-CM**

422 **A:** Original current traces recorded in individual hiPSC-CM differentiated in the absence (0 RA) or  
423 presence of different concentration of RA in in the absence (Basal) and in the presence of 50  $\mu$ M 4-AP  
424 and 5 mM 4-AP. For 0 RA initial part of outward currents is given on an extended scale. Pulse  
425 protocol given as inset. **B:** Summary of the results for peak currents measured in the absence of 4-AP  
426 (basal, B) and in the presence of 50  $\mu$ M and 5 mM 4-AP, recorded in hiPSC-CM cultured with  
427 different concentrations of RA (concentration given on top). Gray lines indicate individual cells  
428 (number of cells given in brackets, dissociated from 3 EHTs). Open circles indicate mean values $\pm$ SD.  
429 \* indicates  $p < 0.05$  repeated measures ANOVA vs. respective basal values, #  $p < 0.05$  one-way  
430 ANOVA of log transformed data.

431 **Figure 2: Concentration-dependency of RA on AP in EHT**

432 **Top left:** Superimposed original traces of AP recorded in EHT based on hiPSC-CM cultured in the  
433 absence (0) or presence of RA concentrations. **Summary of results:** Mean values $\pm$ SD for beating rate  
434 (**BR**), take-off potential (**TOP**), action potential duration (at 20 and 90% repolarization, **APD<sub>20</sub>** and  
435 **APD<sub>90</sub>**) and repolarization fraction (**APD<sub>90</sub>-APD<sub>50</sub>/APD<sub>90</sub>**). \* indicates  $p < 0.05$  vs. 0 RA, one way  
436 ANOVA of log transformed data. Number of EHTs resulting from one differentiation run is given in  
437 brackets.

438 **Figure 3: Concentration-dependency of RA on the AP-response to  $I_{Kur}$  block**

439 **Top:** Superimposed original traces of AP before (Control) and after exposure to 50  $\mu$ M 4-AP in EHT  
440 based on hiPSC-CM cultured in the absence (0 RA) or in the presence of RA (concentration given in  
441 brackets). **Bottom:** Summary of results for the effects of 4-AP on APD<sub>20</sub> (**left**), on plateau voltage  
442 ( $V_{\text{plateau}}$ , **middle**) and on APD<sub>90</sub>; (**right**). Open circles indicate mean values $\pm$ SD. Numbers in brackets  
443 indicate number of EHTs resulting from one differentiation run. \* indicates  $p < 0.05$  vs. 0 RA, one-way  
444 ANOVA of log transformed data.

445 **Figure 4: In aEHT (1  $\mu$ M RA) the  $I_{K_{ur}}$  block-induced shortening of  $APD_{90}$  depends on  $I_{K_r}$**

446 **Top left:** Superimposed original traces of AP in EHT based on hiPSC-CM treated with 1  $\mu$ M RA  
447 before (basal, B) and after exposure to 50  $\mu$ M 4-AP in presence of the  $I_{K_r}$  blocker E-4031 (1  $\mu$ M,  
448 right). Summary of results for the effects of 4-AP in the absence and presence of E-4031 on  $APD_{90}$   
449 top, left), on  $APD_{20}$  (bottom, left) and on plateau voltage ( $V_{plateau}$ , bottom, right). Gray lines indicate  
450 individual EHT. Numbers in brackets indicate number of EHTs resulting from one differentiation run.  
451 Open circles indicate mean values $\pm$ SD. \* indicates  $p<0.05$  vs. basal or E-4031, respectively (paired t-  
452 test).

453 **Figure 5: Concentration-dependency of RA on carbachol effects on  $APD_{90}$  in EHT**

454 **Top:** Superimposed original traces of AP before (basal, B) and after exposure to 10  $\mu$ M carbachol  
455 (CCh) recorded in EHT based on hiPSC-CM cultured in the presence of 0.01, 0.1 and 1  $\mu$ M RA.  
456 **Bottom:** Summary of results for the effects of CCh on beating rate (BR, left), take-off potential (TOP,  
457 middle) and  $APD_{90}$  (right). Gray lines indicate individual EHT. Numbers in brackets indicate number  
458 of EHTs resulting from one differentiation run. Open circles indicate mean values $\pm$ SD. \* indicates  
459  $p<0.05$  vs. basal (paired t-test). Number of EHTs is given in brackets.

460 **Figure 6: Consistent increase of inward rectifier currents upon carbachol in hiPSC-CM (1  $\mu$ M**  
461 **RA)**

462 **Top left:** Superimposed original current traces evoked by a slow voltage ramp in a hiPSC-CM  
463 cultured in the presence of 1  $\mu$ M RA before (Basal) and after exposure to 10  $\mu$ M carbachol. Pulse  
464 protocol given as inset. **Bottom left:** Time course of the current at -100 mV in response to CCh.  
465 **Right:** Summary of results for the current at -100 mV. Gray lines indicate individual hiPSC-aCM,  
466 open circles indicate respective mean values $\pm$ SD. Numbers in brackets indicate number of  
467 cells/number of dissociated EHTs, \* indicates  $p<0.05$  vs. basal (paired t-test).

468 **Figure 7: Reproducibility of RA-effects on AP shape**

469 Top: Original recordings of AP recorded in EHT based on hiPSC-CM treated with 1  $\mu$ M RA or not  
470 from two different cell lines (ERC001 and ERC018). Bottom: Individual data points and mean  
471 values $\pm$ SD for APD<sub>20</sub>, plateau voltage ( $V_{\text{plateau}}$ ) and repolarization fraction ( $\text{APD}_{90}-\text{APD}_{20}/\text{APD}_{90}$ , **D**) in  
472 EHT from three different batches of RA-treated (1  $\mu$ M RA) vs. untreated hiPSC-CM (0 RA) from two  
473 different cell lines. \* indicates  $p < 0.05$  for nested ANOVA vs. 0 RA of the same cell line. # indicates  
474 no significant difference between single batches (ANOVA, every batch against another).

**Table 1: Loss of RA by sterile filtration**

Mean values $\pm$ SD for recovery rate of RA concentration in % of unfiltered controls (n=6, data not shown) for three different filters.

|               | Filtropur S® (n=9) | Millex-GP® (n=9) | Whatman® REZIST (n=9) |
|---------------|--------------------|------------------|-----------------------|
| Recovery in % | 29.8 $\pm$ 2.4     | 28.6 $\pm$ 7.6   | 0.1 $\pm$ 0.01        |

**Table 2: Action potential parameters in different types of atrial cardiomyocytes.**

Overview about action potential (AP) parameters of different cell types and different studies. The different cell types included adult atrial tissue, cardiomyocytes differentiated from human induced pluripotent stem cells (hiPSC-CM) and cardiomyocytes differentiated from human embryonic stem cells (hESC-CM). The effects of carbachol (CCh) and 4-aminopyridine (4-AP) are given as percentage of baseline values. \* indicates an estimated parameter from AP shape.

| Cell type                            | Adult atrial tissue | Adult atrial tissue | Adult atrial tissue | hiPSC-CM   | hiPSC-CM   | hiPSC-CM     | hiPSC-CM        | hiPSC-CM    | hESC-CM      | hESC-CM     | hESC-CM      |
|--------------------------------------|---------------------|---------------------|---------------------|------------|------------|--------------|-----------------|-------------|--------------|-------------|--------------|
| Culture format                       |                     |                     |                     | 3D         | 3D         | 3D           | 3D              | 2D          | 2D           | 2D          | 2D           |
| RA concentration ( $\mu\text{M}$ )   |                     |                     |                     | 1          | 1          | 1            | 0.25-0.5        | 2           | 1            | 1           | 1            |
| Recording technique                  | Sharp ME            | Sharp ME            | Sharp ME            | Sharp ME   | Sharp ME   | VD           | Patch clamp     | Patch clamp | Patch clamp  | Patch clamp | Patch clamp  |
| Temperature                          | 37 °C               | 37 °C               | 37 °C               | 37 °C      | 37 °C      | RT           | 31 °C           | RT          | 36 °C        | RT          | RT           |
| MDP/RMP (mV)                         | -74                 | -75                 | -76                 | -68        | -69        |              | -63             | -55         | -72          | -56         | -56          |
| APA (mV)                             | 95                  |                     |                     | 82         |            |              |                 | 85          | 80           | 82          | 80           |
| APD <sub>20</sub> (ms)               | 7.2                 | 5                   | 8                   | 10         | 31         |              | 115*            | 13*         | 21           | n. d.       | 37*          |
| APD <sub>90</sub> (ms)               | 317                 | 414                 | 314                 | 140        | 220        |              | 205             | 189         | 145          | 169         | 247          |
| APD <sub>20</sub> /APD <sub>90</sub> | 0.02                | 0.01                | 0.02                | 0.07       | 0.14       | 0.12*        | 0.56*           | 0.07        | 0.14         | n. d.       | 0.14         |
| dV/dt <sub>max</sub> (V/s)           | 219                 |                     |                     | 104        |            |              | 7               | 68          | 26           | 13          | 63           |
| V <sub>Plateau</sub>                 | -16                 | -21                 |                     | -16        |            |              |                 |             | -10          |             |              |
| <b>4-AP effect</b>                   |                     |                     |                     |            |            |              |                 |             |              |             |              |
| APD <sub>20</sub> (% of baseline)    |                     | 240                 | 194                 | 300        | 106        |              |                 |             | 205          |             |              |
| APD <sub>90</sub> (% of baseline)    |                     | 84                  | 88                  | 81         | 100        |              |                 |             | 120          |             |              |
| V <sub>PLT</sub> (% of baseline)     |                     | 28                  |                     | 25         | 100        |              |                 |             | 140          |             |              |
| <b>CCh effect</b>                    |                     |                     |                     |            |            |              |                 |             |              |             |              |
| APD <sub>90</sub> (% of baseline)    |                     |                     | 55                  | 60         | 82         |              | 69              |             | 97           |             |              |
| MDP/RMP (% of baseline)              |                     |                     | 102                 | 110        | 107        |              |                 |             | 107          |             |              |
| Author/Year                          | Ravens 2015         | Wettwer 2004        | Lemme 2018          | This study | Lemme 2018 | Cyganek 2018 | Goldfracht 2020 | Lee 2017    | Devalla 2015 | Zhang 2011  | Laksman 2017 |

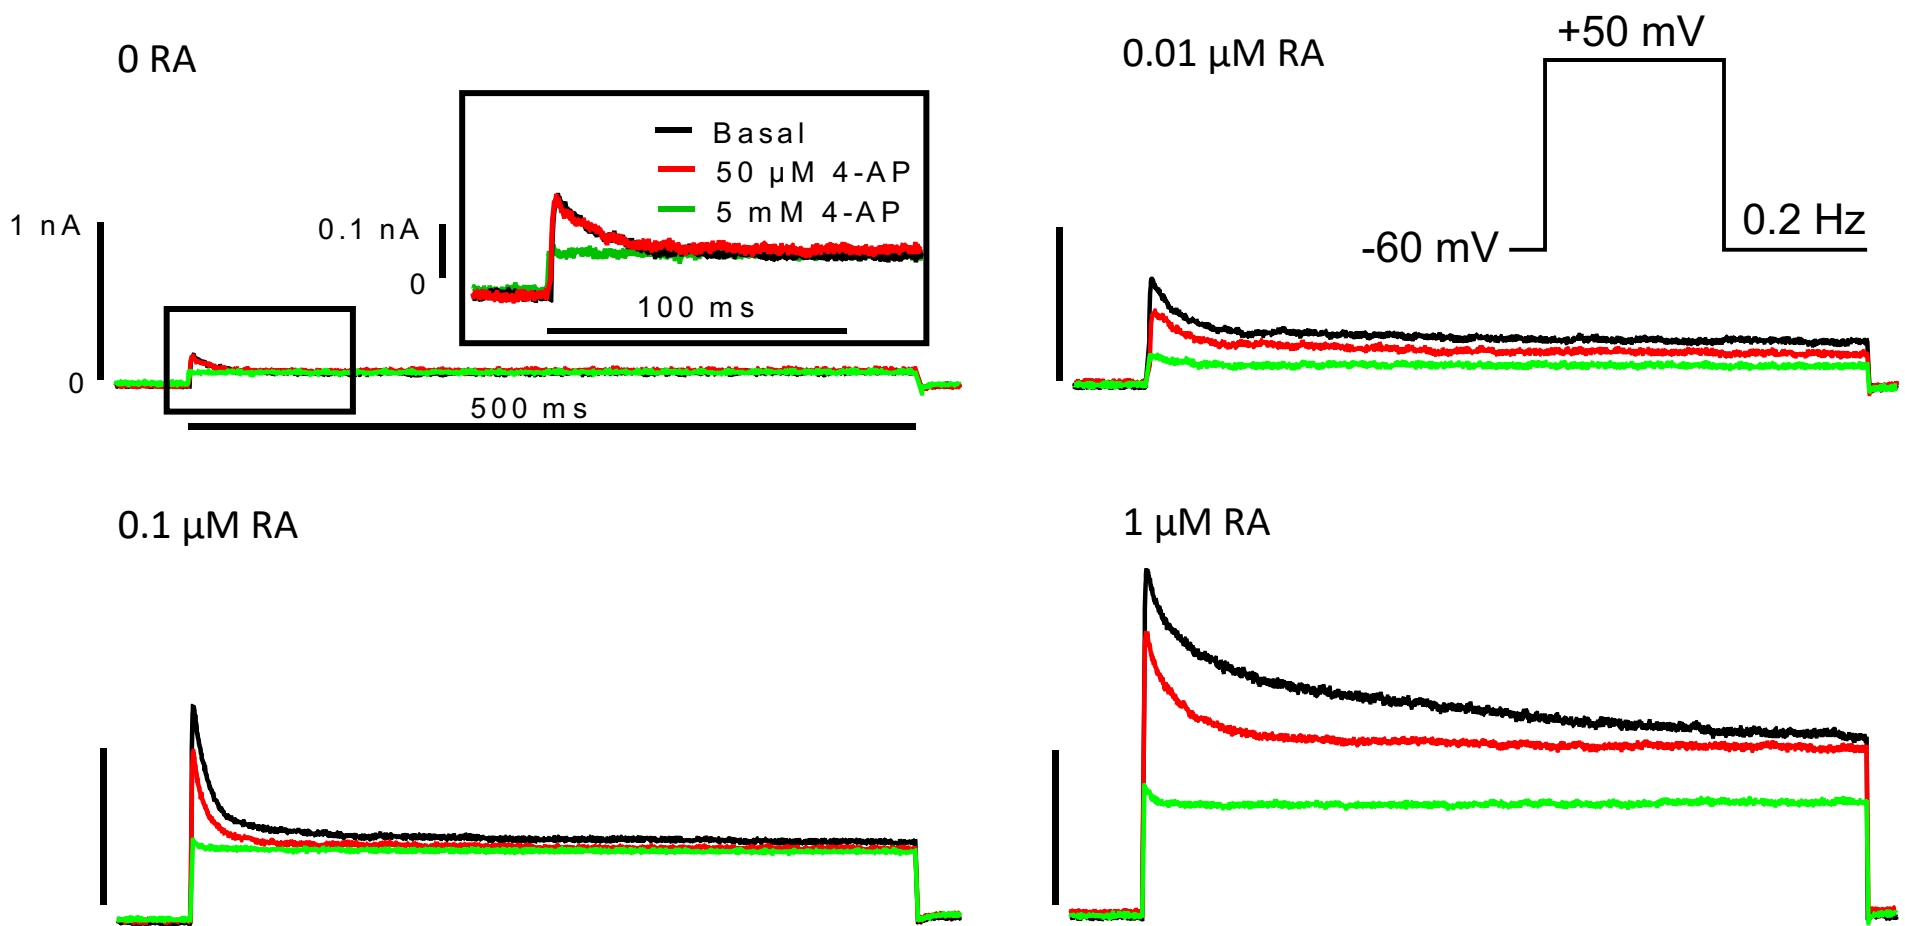

Figure 1 A



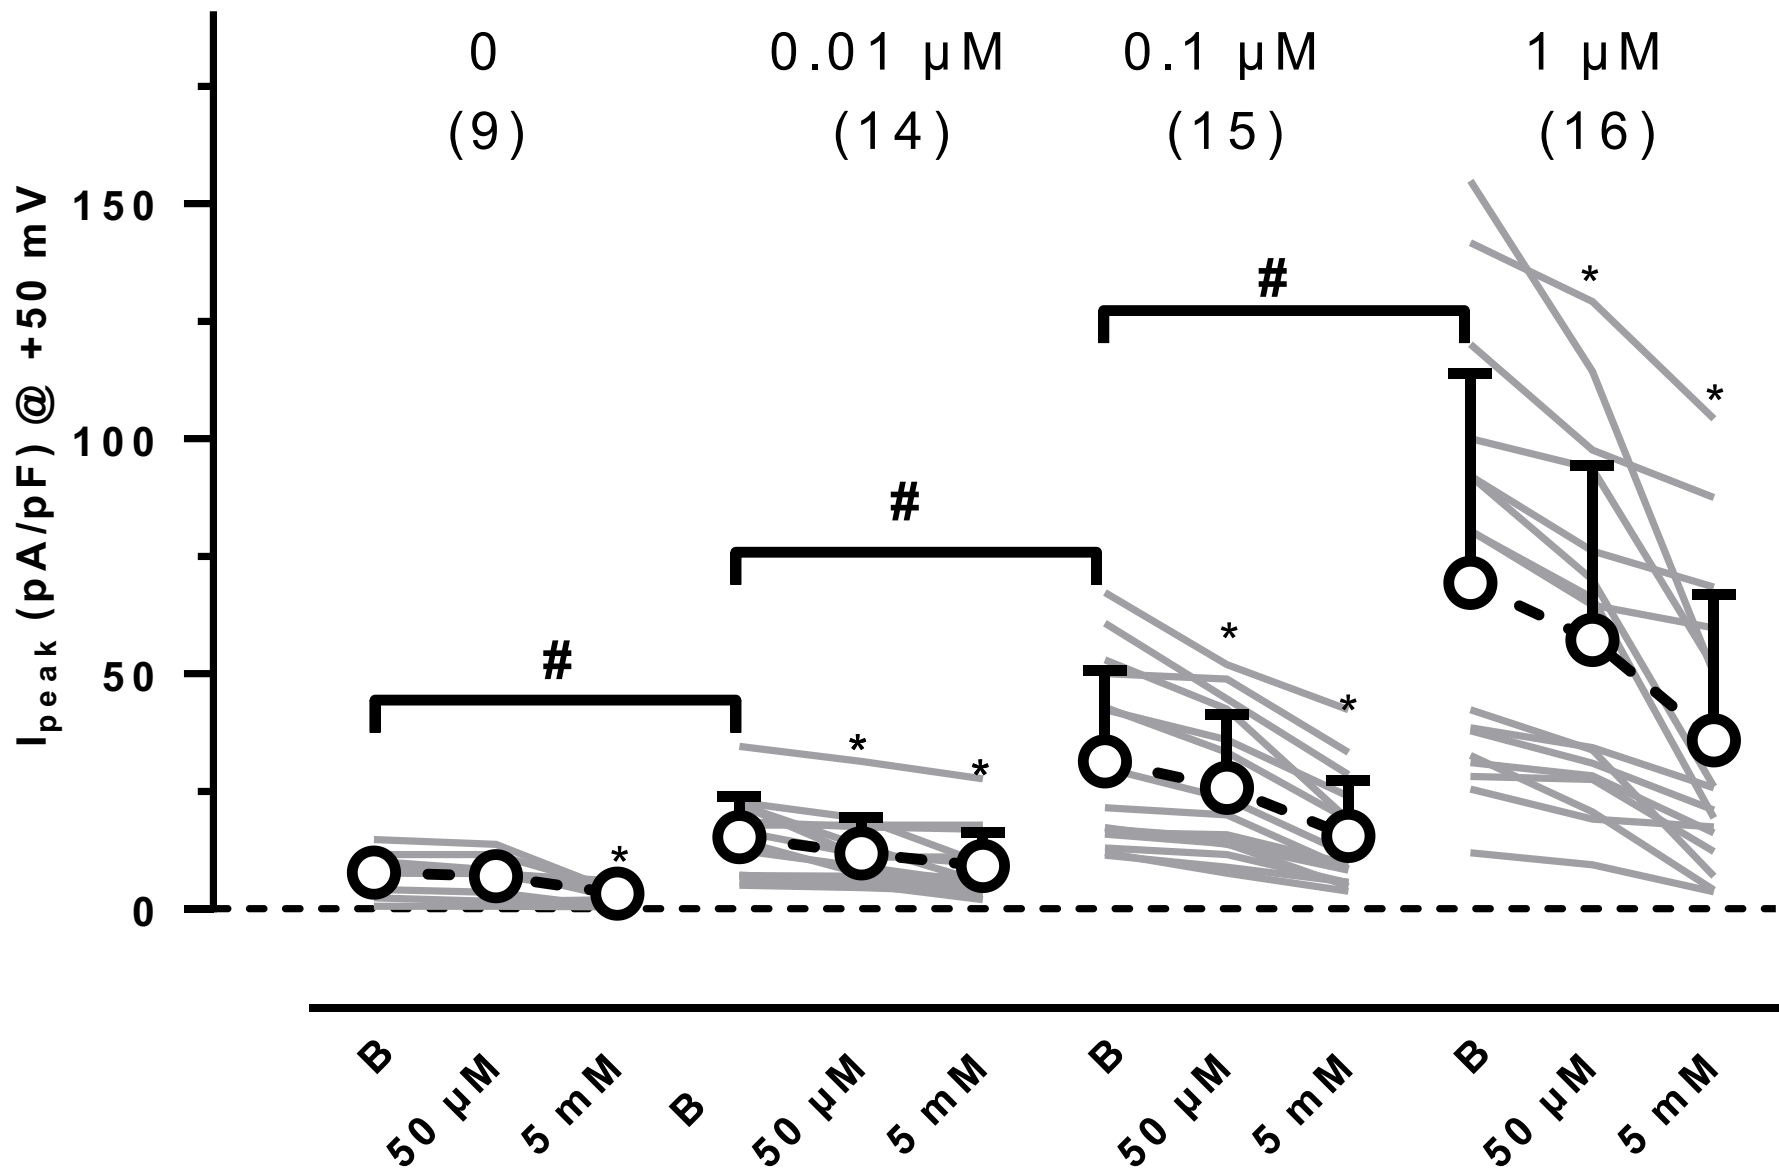

Figure 1 B

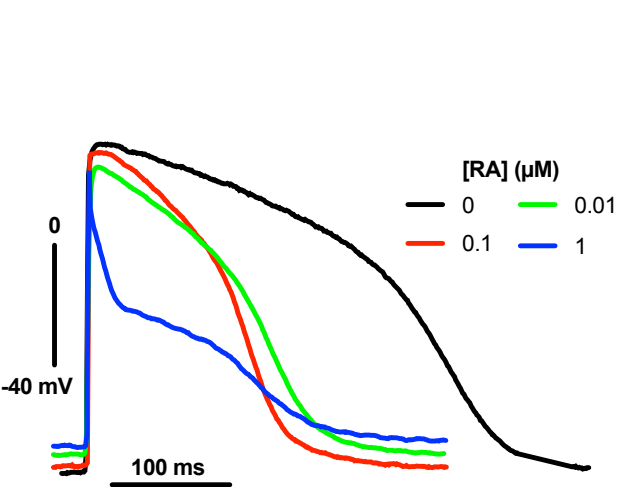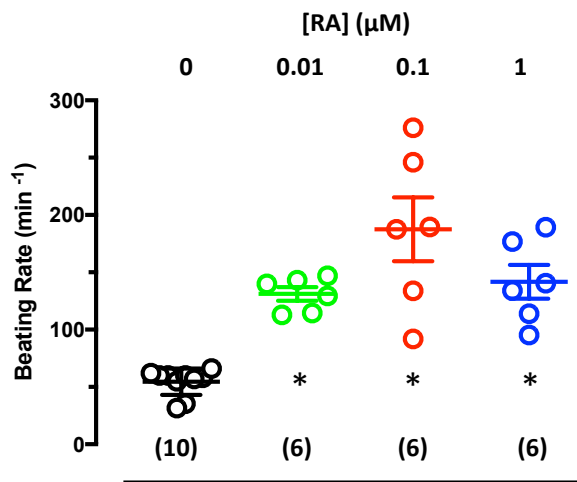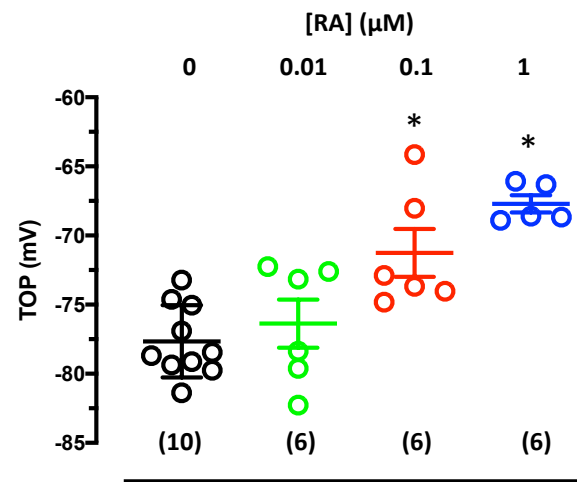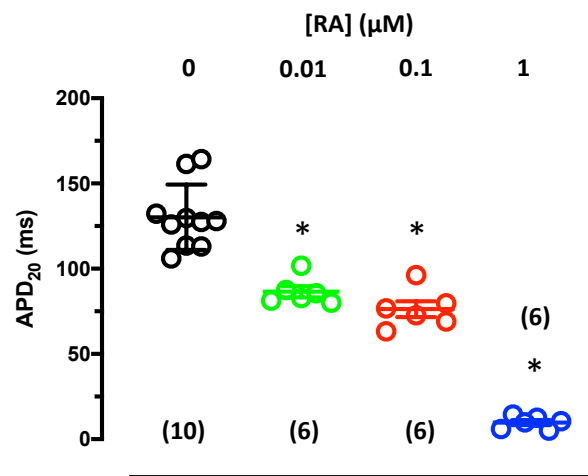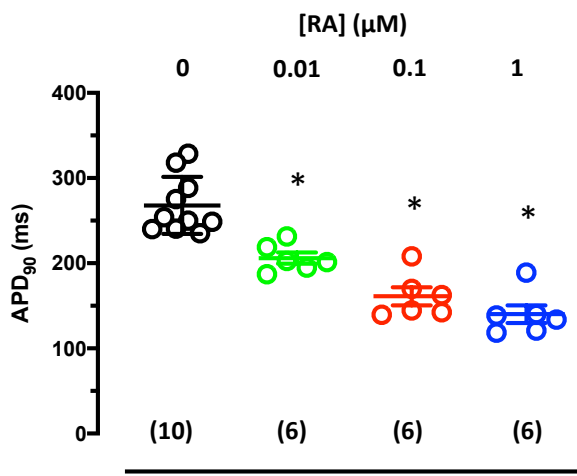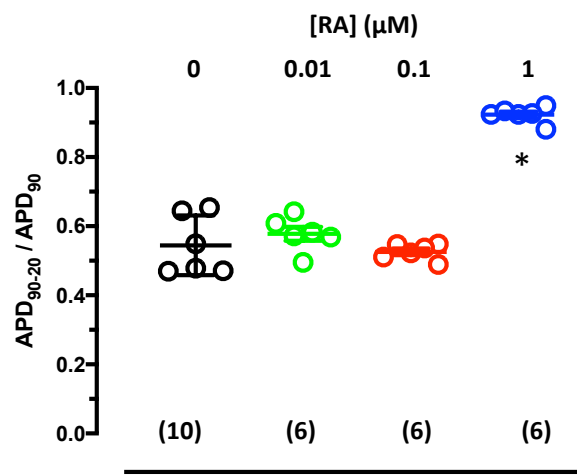

Figure 2

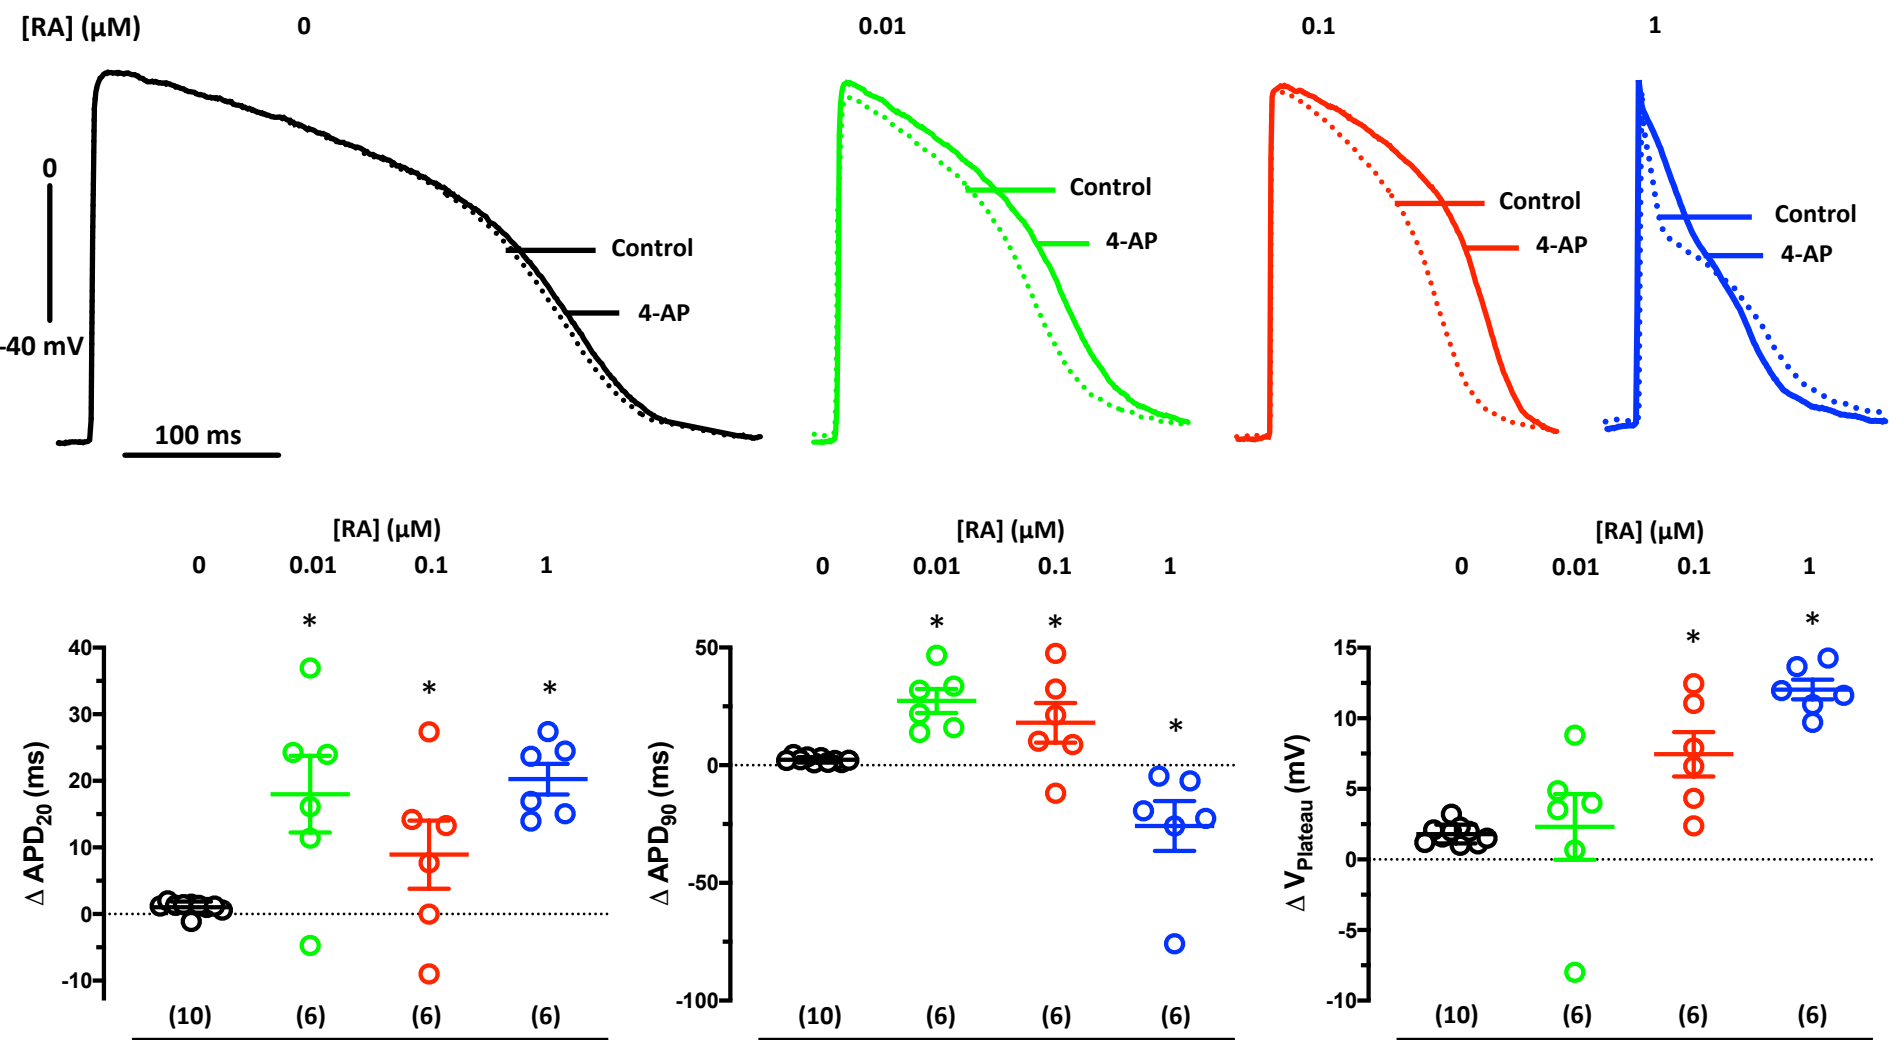

Figure 3

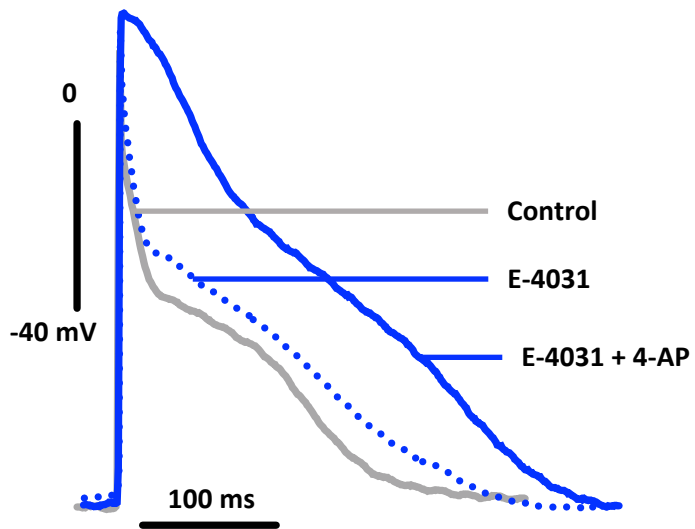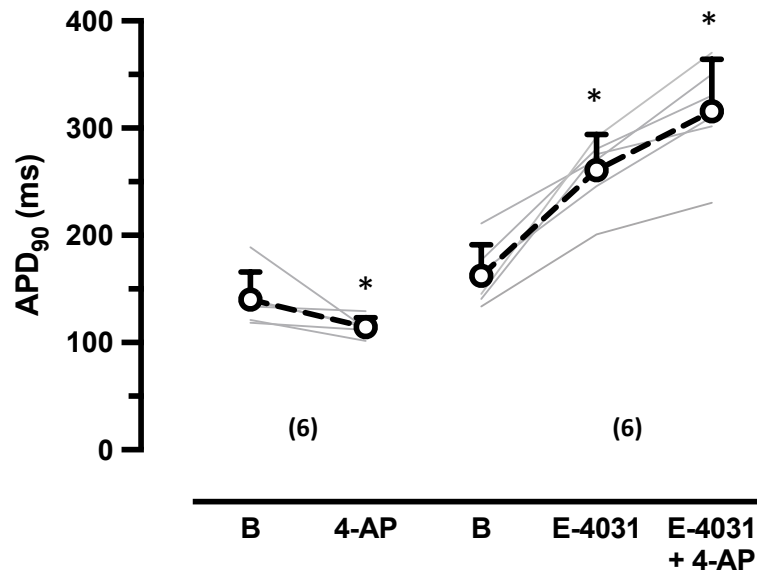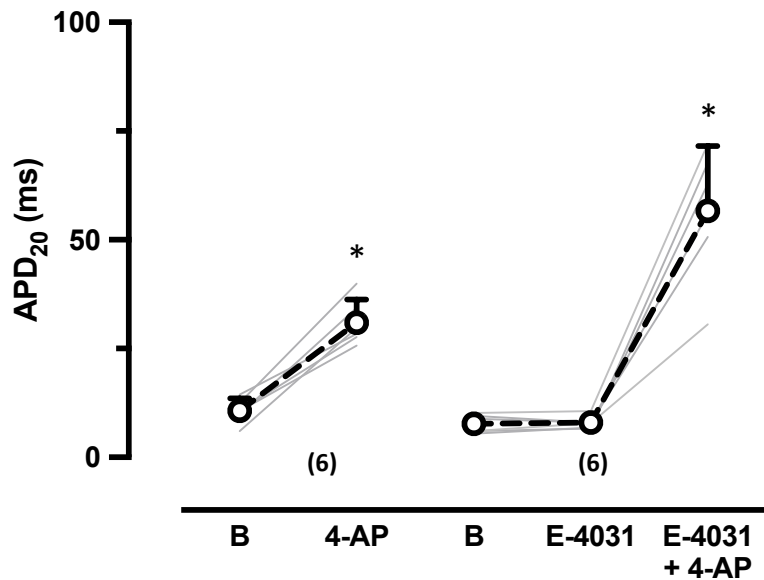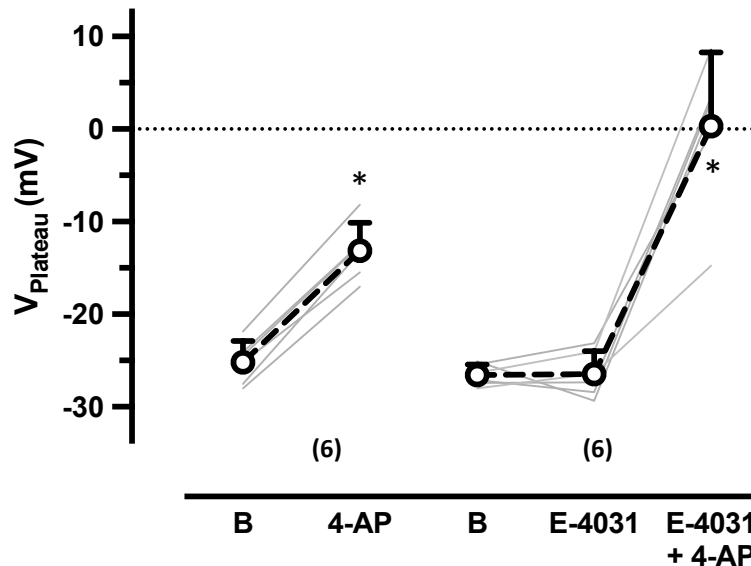

Figure 4

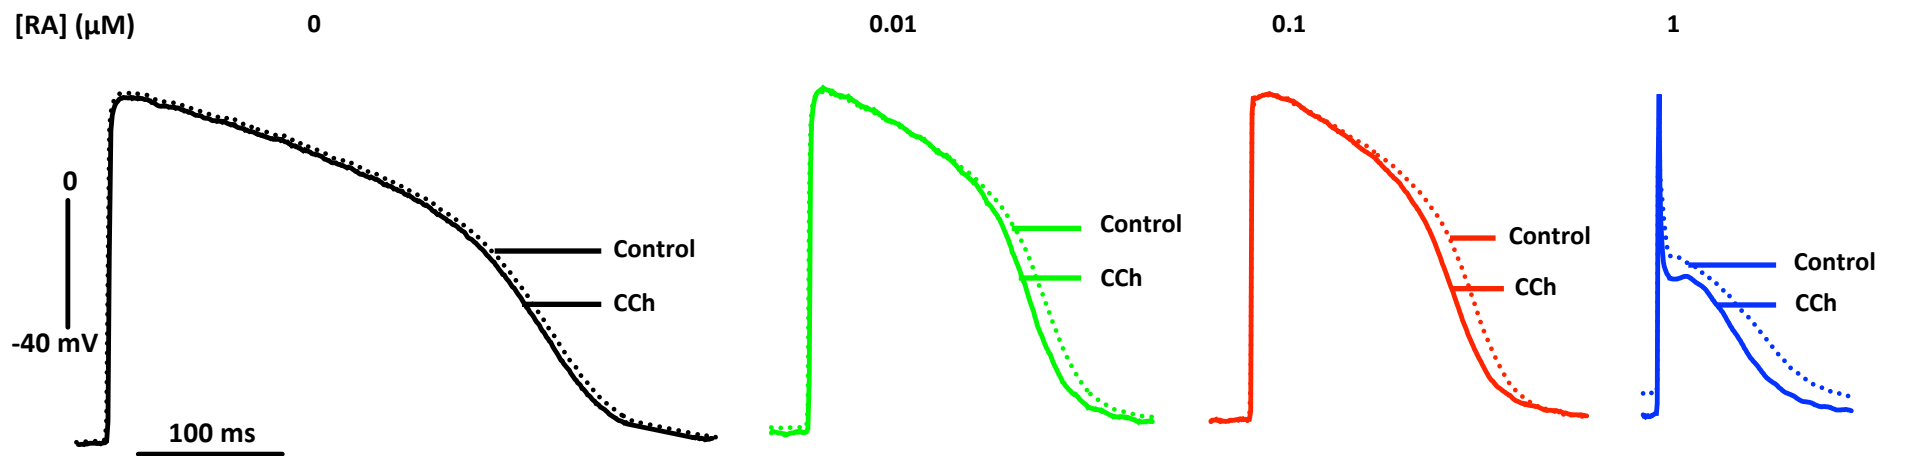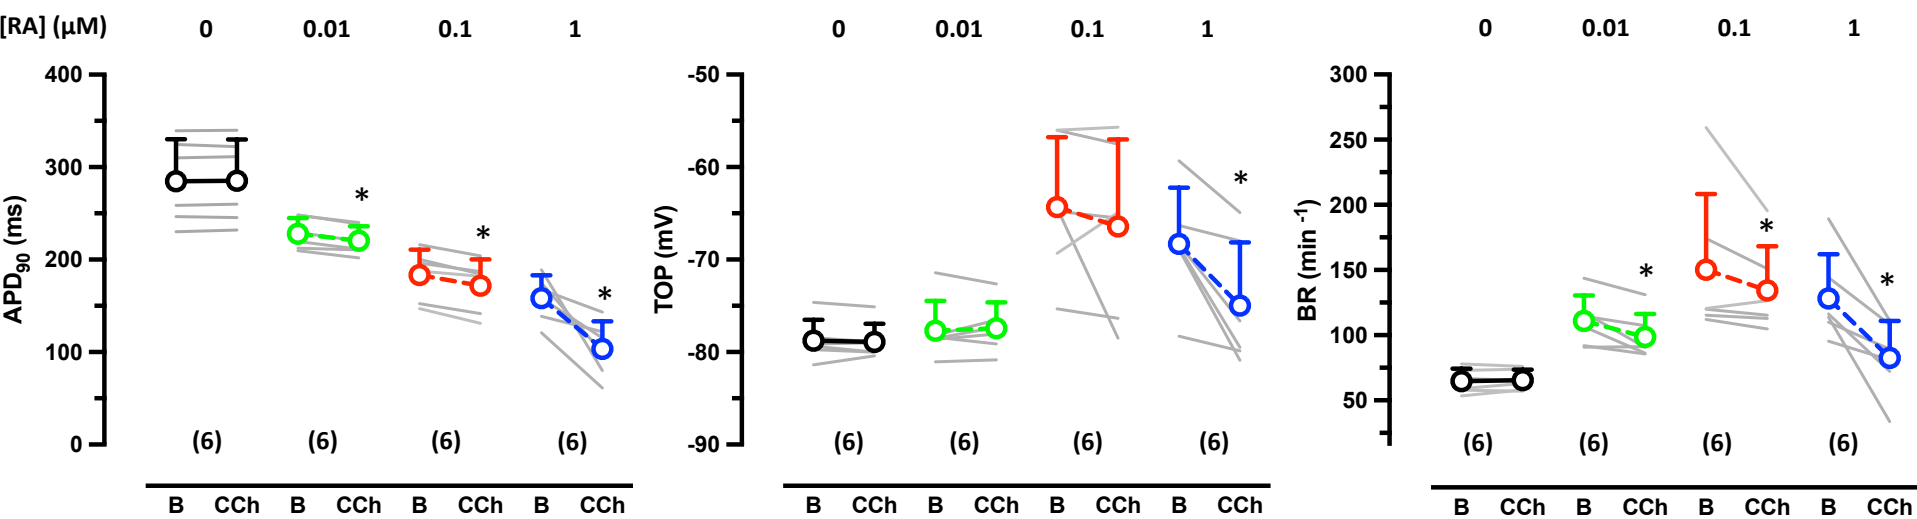

Figure 5

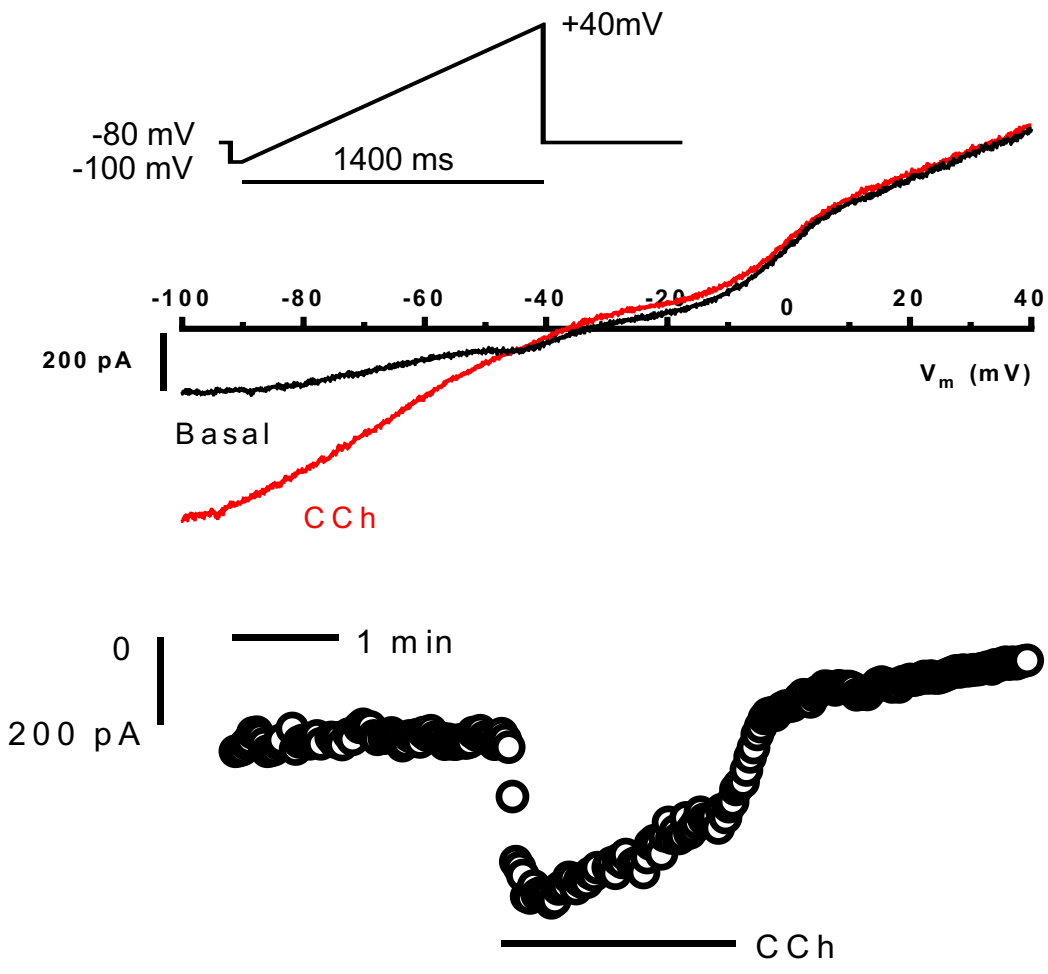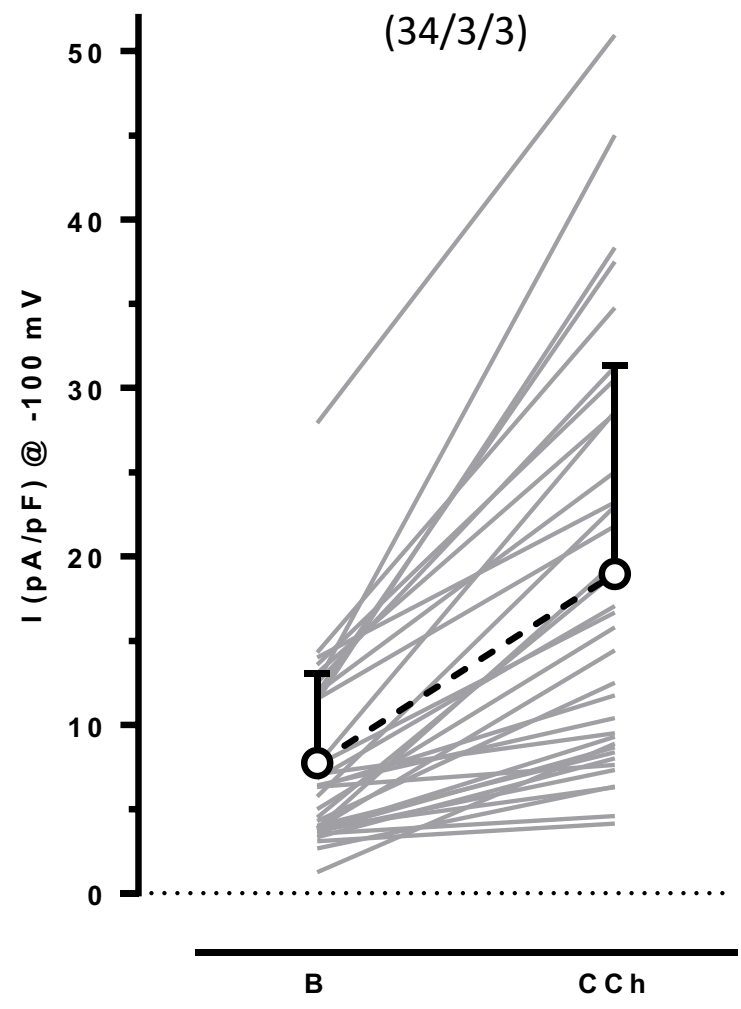

Figure 6

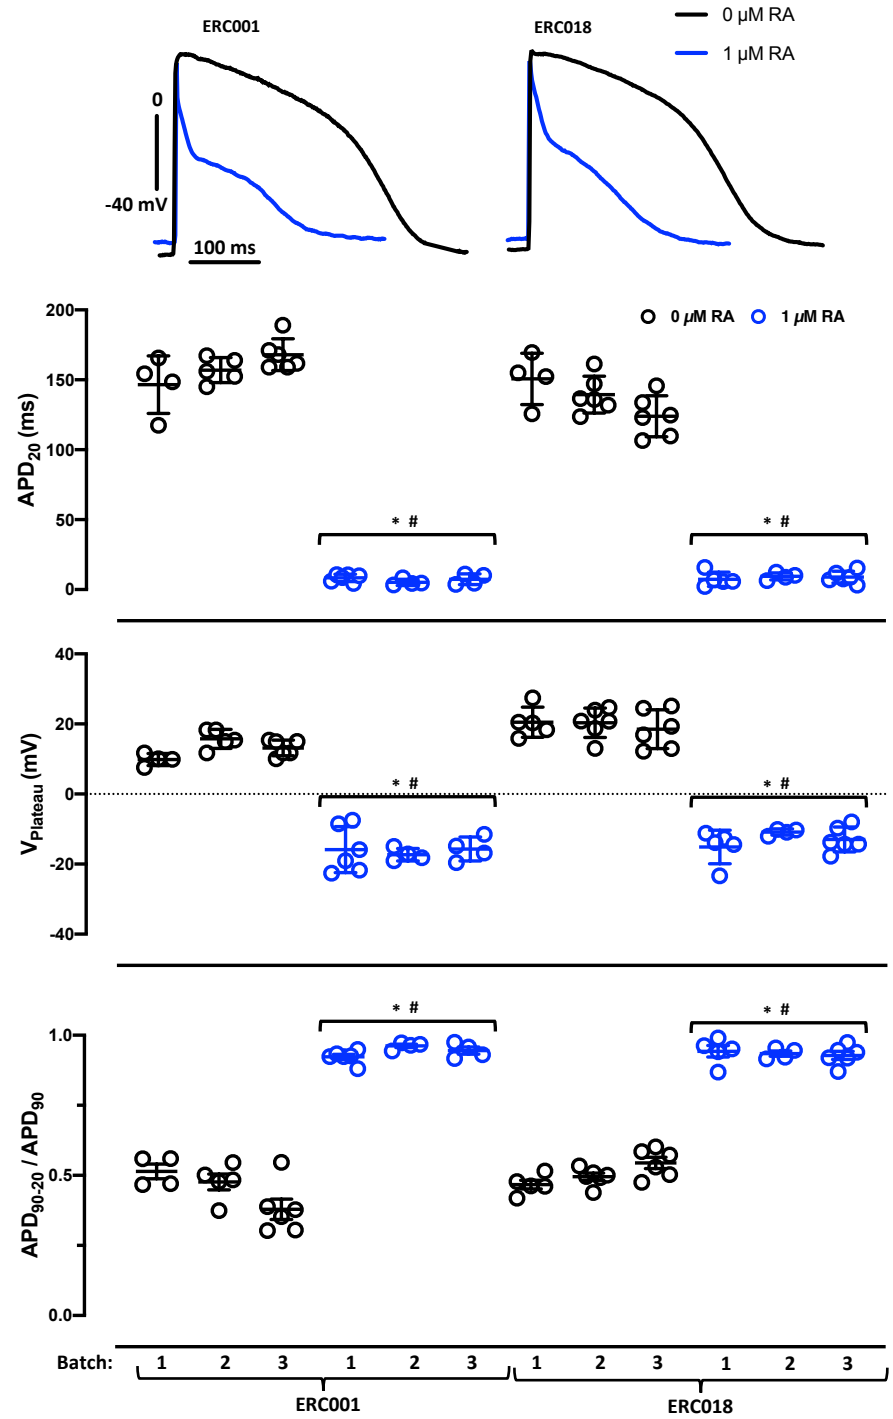

Figure 7
